# Supplementary material
Source: PubMed Central journal article supplement (PMC4143046)
Supplement: 1409490111_pnas.201409490SI.pdf [file 1409490111_pnas.201409490SI.pdf]

# Supporting Information

Mizuno et al. 10.1073/pnas.1409490111

## SI Text

In what follows we report additional data, referring to the (100) and (111) directions in the wave vector space, for both longitu-

dinal and transverse dynamical structure factors. These data are shown for completeness; the main text contains all results needed to support our conclusions.

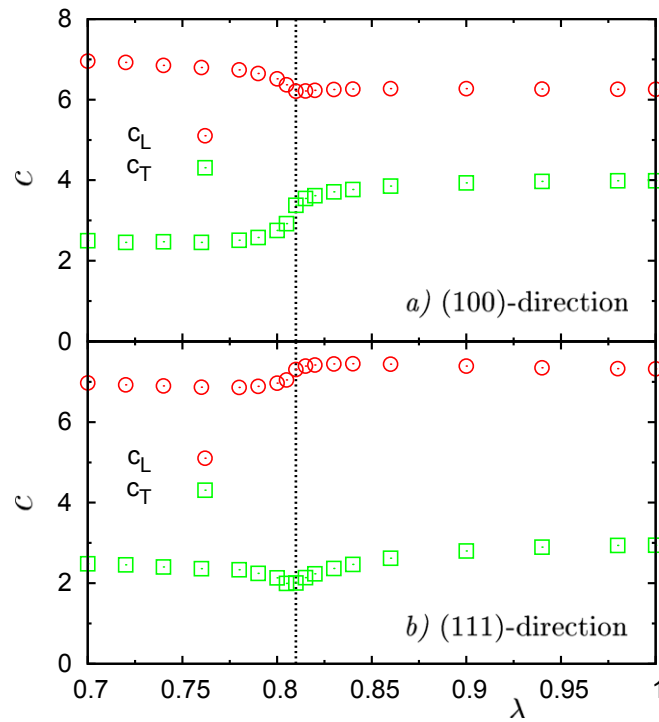

**Fig. S1.**  $\lambda$  dependence of the longitudinal ( $L$ ) and transverse ( $T$ ) macroscopic sound velocities ( $A$ ) in the (100) direction and ( $B$ ) in the (111) direction. These data have been calculated from the effective elastic moduli,  $K + 4G_p/3$ ,  $G_s$  in the (100) direction and  $K + 4G_p/3$ ,  $(2G_p + G_s)/3$  in the (111) direction. The vertical dashed line indicates the transition point  $\lambda = \lambda^* \simeq 0.81$ . Note that in the deep isotropic amorphous state  $\lambda = 0.7$ ;  $c_L$  and  $c_T$  assume the same values in the three directions, (100), (110), and (111).

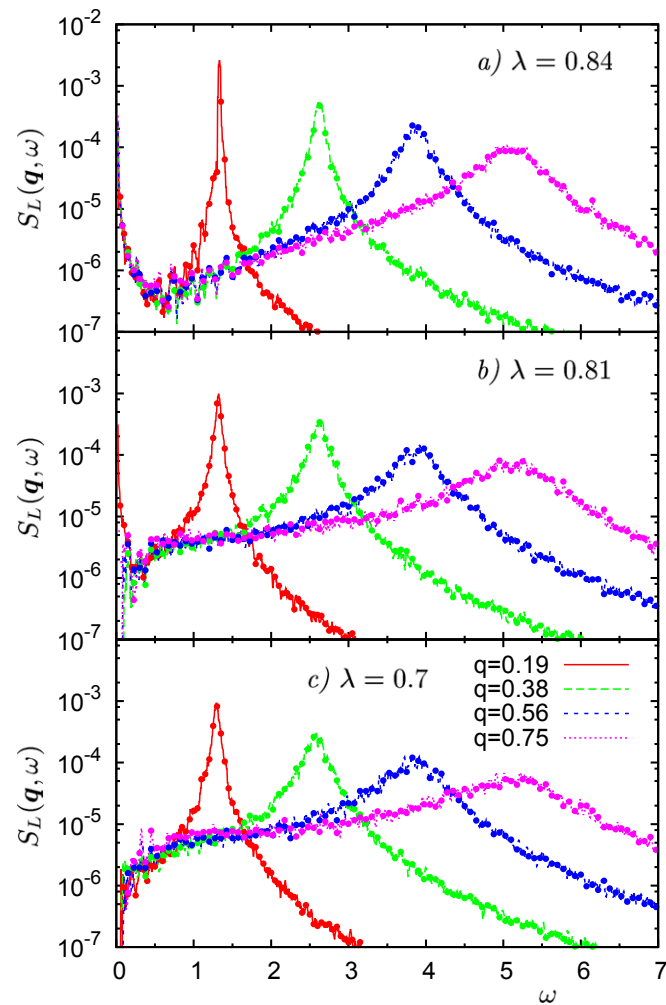

**Fig. S2.** Longitudinal dynamic structure factors,  $S_L(\vec{q}, \omega)$ , at the indicated values of the wave vector  $\vec{q}$  in the (110) direction, calculated from Eq. 1 in the main text. Three values of  $\lambda$  are shown, in a defective crystal state (A), at the amorphisation transition (B), and in the fully developed glassy phase (C). Contrary to the case of the transverse dynamic structure factors  $S_T(\vec{q}, \omega)$  shown in Fig. 2 in the main text,  $S_L(\vec{q}, \omega)$  features a single Brillouin peak even in the lattice cases.

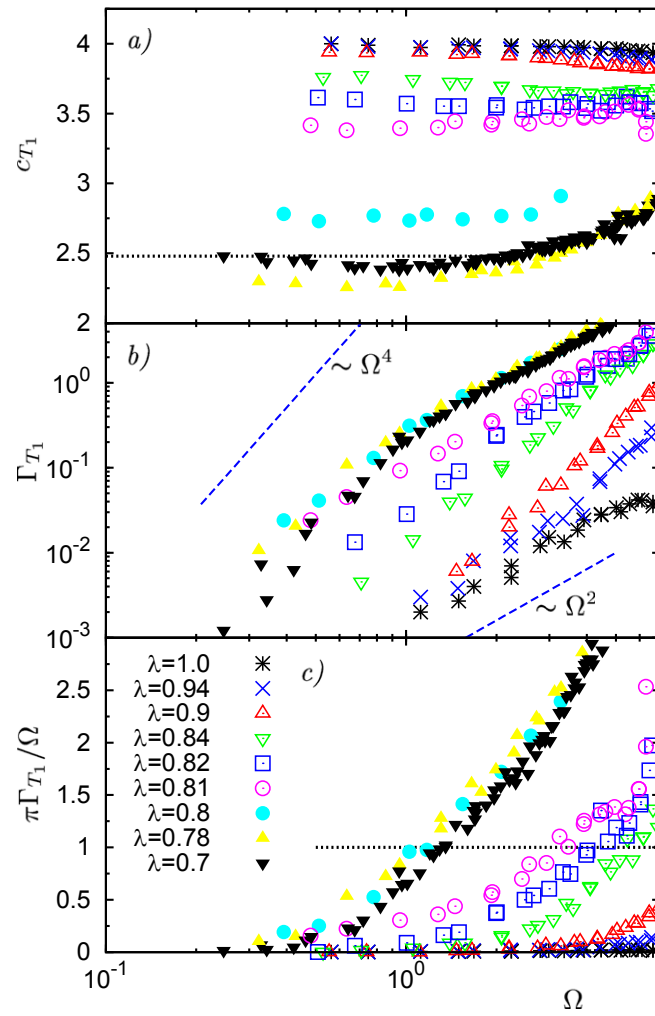

**Fig. S3.** Spectroscopic parameters calculated from the transverse dynamic structure factors  $S_T(\vec{q}, \omega)$ . (A) Transverse phase velocity  $c_{T_1}(\Omega) = \Omega_{T_1}(q)/q$  and (B) broadening  $\Gamma_{T_1}(\Omega)$  for the  $T_1$  excitations in the (110) direction at the indicated values of  $\lambda$ . The horizontal dashed line in A corresponds to the macroscopic limit of the sound velocity at  $\lambda = 0.7$ . The dashed lines  $\propto \Omega^2$  and  $\propto \Omega^4$  in B are guides for the eye. (C) The ratio  $\pi\Gamma_{T_1}(\Omega)/\Omega$  is plotted as a function of  $\Omega$ . The value  $\Omega$  for which  $\pi\Gamma_{T_1}(\Omega)/\Omega = 1$  (horizontal line) defines the Ioffe-Regel limit  $\Omega_{T_1}^{\text{IR}}$ .

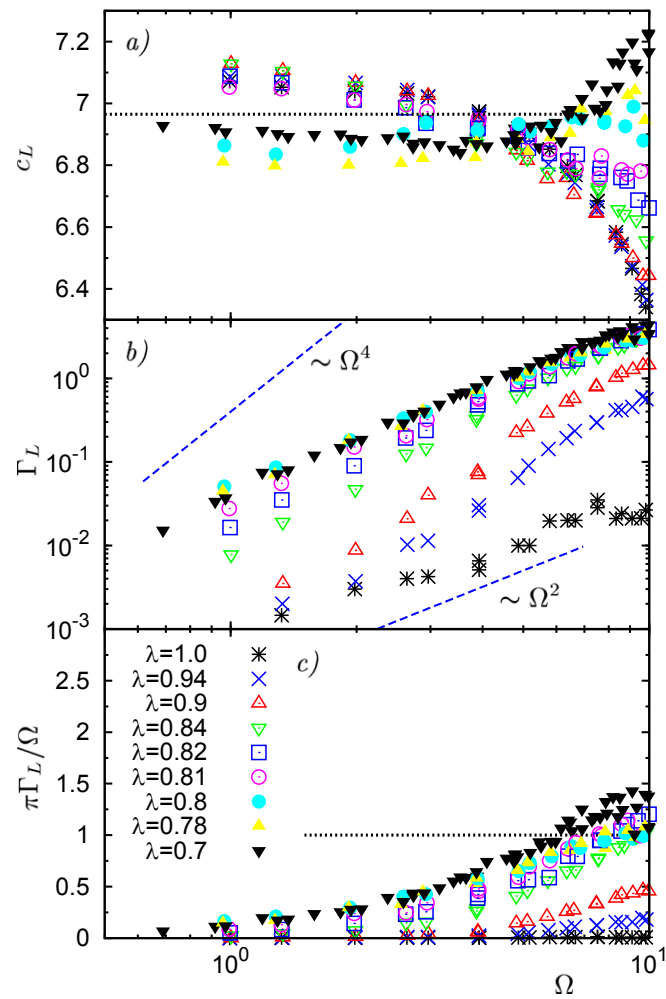

**Fig. S4.** Spectroscopic parameters calculated from the longitudinal dynamic structure factors  $S_L(\vec{q}, \omega)$ . (A) Longitudinal phase velocity  $c_L(\Omega) = \Omega_L(q)/q$  and (B) broadening  $\Gamma_L(\Omega)$  for the  $L$  excitations in the (110) direction at the indicated values of  $\lambda$ . (C) The ratio  $\pi\Gamma_L(\Omega)/\Omega$  is plotted as a function of  $\Omega$  (also see the caption for Fig. S3).
